RESEARCH ARTICLE

# Association between the AUC<sub>0-24</sub>/MIC Ratio of Vancomycin and Its Clinical Effectiveness: A Systematic Review and Meta-Analysis

Peng Men<sup>1,2</sup>, Hui-Bo Li<sup>1,2</sup>, Suo-Di Zhai<sup>1\*</sup>, Rong-Sheng Zhao<sup>1</sup>

**1** Department of Pharmacy, Peking University Third Hospital, Beijing, China, **2** Department of Pharmacy Administration and Clinical Pharmacy, School of Pharmaceutical Sciences, Peking University, Beijing, China

\* [zhaisuodi@163.com](mailto:zhaisuodi@163.com)

## Abstract

### Background

A target AUC<sub>0-24</sub>/MIC ratio of 400 has been associated with its clinical success when treating *Staphylococcus aureus* infections but is not currently supported by state-of-the-art evidence-based research.

### Objective

This current systematic review aimed to evaluate the available evidence for the association between the AUC<sub>0-24</sub>/MIC ratio of vancomycin and its clinical effectiveness on hospitalized patients and to confirm the existing target value of 400.

### Methods

PubMed, Embase, Web of Sciences, the Cochrane Library and two Chinese literature databases (CNKI, CBM) were systematically searched. Manual searching was also applied. Both RCTs and observational studies comparing the clinical outcomes of high AUC<sub>0-24</sub>/MIC groups versus low AUC<sub>0-24</sub>/MIC groups were eligible. Two reviewers independently extracted the data. The primary outcomes were mortality and infection treatment failure. Risk ratios (RRs) with 95% confidence intervals (95% CIs) were calculated.

### Results

No RCTs were retrieved. Nine cohort studies were included in the meta-analysis. Mortality rates were significantly lower in high AUC<sub>0-24</sub>/MIC groups (RR = 0.47, 95%CI = 0.31–0.70, p<0.001). The rates of infection treatment failure were also significantly lower in high AUC/MIC groups and were consistent after correcting for heterogeneity (RR = 0.39, 95%CI = 0.28–0.55, p = 0.001). Subgroup analyses showed that results were consistent whether MIC values were determined by broth microdilution (BMD) method or Etest method. In studies using the BMD method, breakpoints of AUC<sub>0-24</sub>/MIC all fell within 85% to 115% of 400.

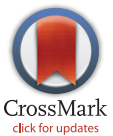

## OPEN ACCESS

**Citation:** Men P, Li H-B, Zhai S-D, Zhao R-S (2016) Association between the AUC<sub>0-24</sub>/MIC Ratio of Vancomycin and Its Clinical Effectiveness: A Systematic Review and Meta-Analysis. PLoS ONE 11 (1): e0146224. doi:10.1371/journal.pone.0146224

**Editor:** Nagendra R Hegde, Ella Foundation, INDIA

**Received:** March 10, 2015

**Accepted:** December 15, 2015

**Published:** January 5, 2016

**Copyright:** © 2016 Men et al. This is an open access article distributed under the terms of the [Creative Commons Attribution License](https://creativecommons.org/licenses/by/4.0/), which permits unrestricted use, distribution, and reproduction in any medium, provided the original author and source are credited.

**Data Availability Statement:** All relevant data are within the paper and its Supporting Information files.

**Funding:** The authors received no specific funding for this work.

**Competing Interests:** The authors have declared that no competing interests exist.

## Conclusions

This meta-analysis demonstrated that achieving a high  $AUC_{0-24}/MIC$  of vancomycin could significantly decrease mortality rates by 53% and rates of infection treatment failure by 61%, with 400 being a reasonable target.

## Introduction

Vancomycin, a glycopeptide antibiotic, was developed and released in the 1950s for the treatment of aerobic gram-positive infections and has been widely used primarily in the treatment of methicillin-resistant *Staphylococcus aureus* (MRSA) infections[1]. In recent years, MRSA has spread globally, and the incidence of MRSA has shown a rising trend. Meanwhile, concerns have been raised about inadequate responses to vancomycin if the minimum inhibitory concentration (MIC) of the infecting organism lies at the upper end of the susceptible range[2]. Thus, there is a growing need for monitoring vancomycin levels, evaluating the relationship between its clinical effectiveness and pharmacokinetic parameters, and developing an individualized dosing regimen[3].

Vancomycin appears to follow time-dependent killing[4]. *In vitro* tests and limited human trials have shown that the ratio of the 24-hour area under the concentration-time curve and MIC ( $AUC_{0-24}/MIC$ ) of vancomycin is the pharmacokinetic/pharmacodynamics (PK/PD) parameter that is most relevant to its clinical effectiveness in the treatment of *Staphylococcus aureus* infections[5,6]. An  $AUC_{0-24}/MIC$  ratio higher than 400 is regarded as the target of clinical success. However, this conclusion was based on only one clinical observational study, which used the broth microdilution (BMD) method to test MIC, and had not been confirmed by performing a systematic review. Moreover, little was known regarding to what extent achieving high  $AUC_{0-24}/MIC$  levels of vancomycin could enhance its clinical effectiveness. Thus, we performed a systematic review and meta-analysis to study these issues.

## Methods

### Search strategy

Previously published articles and conference abstracts (until Jan 16, 2014) reporting the association between the  $AUC_{0-24}/MIC$  ratio of vancomycin and its clinical effectiveness were identified by computerized literature searches in PubMed, Embase, the Web of Science, the Cochrane Library and two Chinese literature databases (CNKI and CBM). Reference lists of the retrieved articles and supplemental materials were also examined manually to further identify potentially relevant studies. The search term was “vancomycin”. No restriction on language was applied. This study was a part of the development of Chinese practice guideline for therapeutic drug monitoring (TDM) of vancomycin launched by the Division of Therapeutic Drug Monitoring, Chinese Pharmacological Society.

### Selection criteria

The literature was divided into eight parts whose eligibility was assessed according to titles and abstracts by eight separate groups based on PICOs relating to the development of Chinese practice guideline for vancomycin TDM (See [S1 File](#) for details). Each group consisted of two independent assessors. Results of the assessment were converged as a whole.

Furthermore, two authors (PM and HBL) independently searched the literature and examined the relevant studies for further assessment of the data. Each reviewer was blinded to the other reviewer during the process of data extraction. In cases of disagreement between the two reviewers, a third author (SDZ) was consulted. Both randomized controlled trials (RCTs) and observational studies were eligible with the following inclusion criteria: 1) comparing clinical effectiveness of high and low AUC<sub>0-24</sub>/MIC levels of vancomycin monotherapy; 2) breakpoints of the AUC<sub>0-24</sub>/MIC ratio were reported; 3) patients were diagnosed with gram-positive infections with well-validated diagnostic criteria. Reviews, editorials, guidelines and case reports were excluded. We also contacted the authors for related information if data provided were insufficient.

## Data extraction and outcomes

All data were extracted independently by the two authors. Data extracted from the identified studies included the author (s), year of publication, country in which the study was conducted, study design, number of patients enrolled, population characteristics (type and etiology of infections), results of clinical outcomes and breakpoints of AUC<sub>0-24</sub>/MIC ratio. The outcomes of the review were all-cause mortality and infection treatment failure.

## Quality appraisal

Two authors independently assessed the quality of included studies. Discrepancies were resolved by discussion or through consultation with the third reviewer (SDZ). The potential risks of bias in RCTs were assessed according to the criteria developed using the Cochrane risk of bias tool. The quality of observational studies was assessed using the New Castle-Ottawa (NOS) scales.

## Statistical analysis

All statistical analyses were performed in STATA 12.0 (Stata Corp LP, College Station, TX, United States). Pooled risk ratios (RRs) and 95% confidence intervals (CIs) were calculated using the Mantel-Haenszel (M-H) fixed effects model if there was no evidence of significant heterogeneity for these outcomes, or random effects model if significant heterogeneity for these outcomes was present. Subgroup analyses were performed according to different methods for MIC determination. Heterogeneity among the studies was assessed using  $\chi^2$  test and quantified using the Higgins  $I^2$ [7]. To account for the low statistical power of the  $\chi^2$  test for heterogeneity,  $P = 0.10$  was considered not significant. If  $P < 0.10$ , then a sensitivity analysis was performed to assess the validity of the outcomes. Publication bias was examined by Egger's tests if there were at least five studies for each outcome[8]. The significance level was set at 0.05.

Methods for this systematic review were developed according to recommendations from the Preferred Reporting Items for Systematic Reviews and Meta-Analyses (PRISMA) checklists (See [S2 File](#) for details).

## Results

A total of 66464 were excluded from 67406 references after a review of titles: 21621 were duplicate and 44843 were not relevant to the guideline drafting. Next, we initially identified 942 potentially relevant studies using systematic database searching and 13 studies using manual searching. The full-text articles of the remaining 955 studies were evaluated. Another 938 studies were excluded because they were not relevant to this systematic review. Among the other 17

studies, 5 of the studies did not compare the clinical outcomes between the high and low  $AUC_{0-24}/MIC$  ratio groups, 3 studies did not present sufficient clinical data. Nine studies were ultimately included in the meta-analysis. The flow chart of selection of studies and reasons for exclusion is presented in [Fig 1](#).

## Study description

Studies included in our review were all cohort studies[9–17]. No RCTs were retrieved. These studies included a total of 916 patients. A summary description of the included studies is reported in [Table 1](#). Of these studies, four studies were performed in the United States, two in Australia, and one each in Belgium, Canada, and the Republic of Korea.

## Quality of the included studies

Quality appraisal of the included cohort studies is shown in [Table 2](#). Six studies completely accounted for the nine factors assessed. One study was adequate in eight of the nine factors, and two studies were adequate in seven of the nine factors.

## Outcomes

**Mortality.** Four studies reported all-cause mortality. There was no significant heterogeneity among these studies ( $p = 0.785, I^2 = 0.0\%$ ), so a fixed effects model was used ([Fig 2](#)). Compared with low  $AUC_{0-24}/MIC$  groups, the high  $AUC_{0-24}/MIC$  groups had significantly lower mortality rates ( $RR = 0.47, 95\%CI = 0.31-0.70, p < 0.001$ ).

Among these studies, two studies applied the BMD method (referred to as the “BMD Study”), and the remaining studies applied the Etest method (referred to as the “Etest Study”) for MIC determination. Subgroup analyses showed that in both the BMD Study and Etest Study, high  $AUC_{0-24}/MIC$  groups had significantly lower mortality rates (BMD:  $RR = 0.49, 95\%CI = 0.31-0.77, p = 0.002$ ; Etest:  $RR = 0.37, 95\%CI = 0.15-0.93, p = 0.034$ ). No significant heterogeneity was found (BMD:  $p = 0.395, I^2 = 0.0\%$  and Etest:  $p = 0.817, I^2 = 0.0\%$ ).

**Rate of infection treatment failure.** Six studies reported rates of infection treatment failure. There was significant heterogeneity among these studies ( $p = 0.014, I^2 = 64.7\%$ ), and thus we used a random-effect model ([Fig 3](#)). Compared with low  $AUC_{0-24}/MIC$  groups, high  $AUC_{0-24}/MIC$  groups had significantly lower rates of infection treatment failure ( $RR = 0.47, 95\%CI = 0.30-0.73, p = 0.001$ ). These six studies applied the BMD method to determine the MIC values.

**Breakpoints of the  $AUC_{0-24}/MIC$  ratio.** Among the studies included in this systematic review, seven studies applied BMD method to determine the MIC values. All breakpoints reported from these studies fell within 85% to 115% of 400, ranging from 345 to 451 (See [Table 3](#)).

## Heterogeneity and publication bias

Because there was significant heterogeneity among the studies reporting rates of infection treatment failure, we performed a sensitivity analysis (See [S1 Fig](#)), which showed that Kullar’s study had a significant effect on the meta-analysis result. Heterogeneity was not significant after we excluded that study ( $I^2 = 0.0\%, p = 0.858$ ) and results were consistent (See [Fig 4](#),  $RR = 0.39, 95\%CI = 0.28-0.55, p = 0.001$ ).

For rates of infection treatment failure, the amount of studies was enough to perform the Egger’s test for publication bias. No significant result was observed ( $P = 0.706$ ).

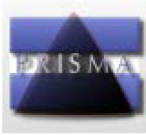

PRISMA 2009 Flow Diagram

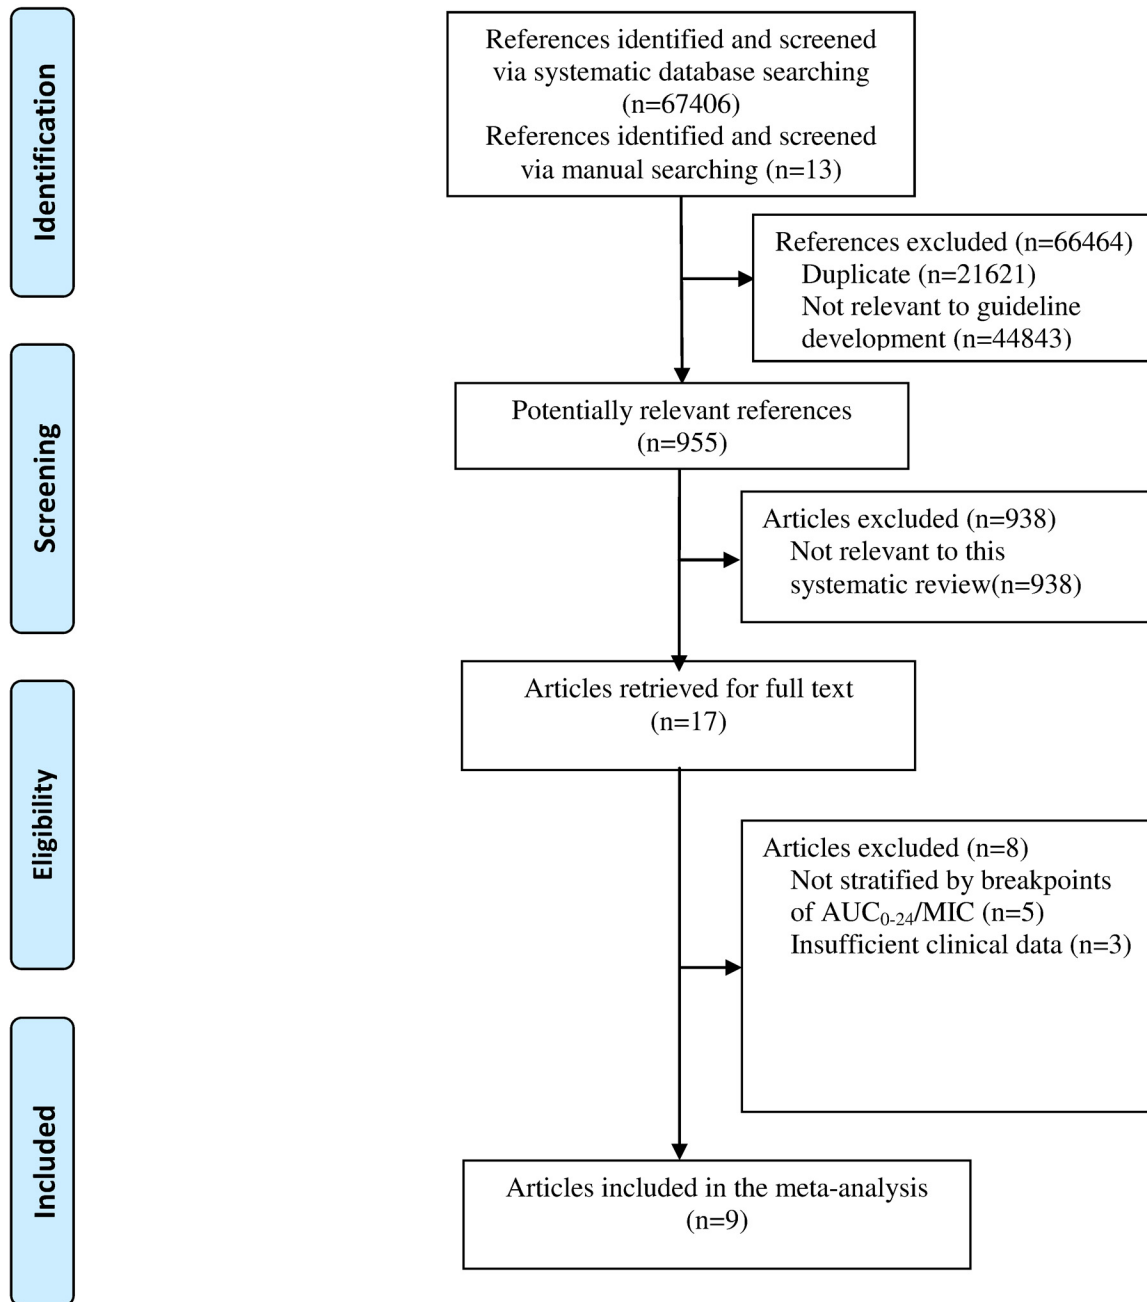

Fig 1. Flow chart depicting the selection process of studies included in the meta-analysis.

doi:10.1371/journal.pone.0146224.g001

**Table 1. Main Characteristics of Studies Included in the Meta-analysis.**

| Reference (year)             | Study design; country                | Number of patients | Pathogens        | Type of infections                                                                                                           | Male, % | Mean age(SD) |
|------------------------------|--------------------------------------|--------------------|------------------|------------------------------------------------------------------------------------------------------------------------------|---------|--------------|
| Ampe et al. (2013) [9]       | Prospective; Belgium                 | 20                 | CoNS, MRSA, MSSA | Foreign body, osteomyelitis, septicaemia                                                                                     | 70      | 65.6 (12.6)  |
| Brown et al. (2012)[10]      | Retrospective; the United States     | 44                 | MRSA             | Complicated bacteremia, infective endocarditis                                                                               | 50      | 54.8(16)     |
| Gawronski et al. (2013)[11]  | Retrospective; the United States     | 59                 | MRSA             | Complicated bacteria, osteomyelitis                                                                                          | 59      | 54(16)       |
| Ghosh et al. (2014)[12]      | Retrospective; Australia             | 127                | MRSA             | Abdominal sources, endocarditis, non-endocarditis vascular sources, pneumonia                                                | 68.5    | 64.6(NR)     |
| Holmes et al. (2013)[13]     | Prospective <sup>a</sup> ; Australia | 182                | MRSA, MSSA       | Endocarditis, osteoarticular, pneumonia, sepsis syndrome, skin and soft tissue                                               | 70      | NR           |
| Jung et al.(2014) [14]       | Retrospective; the Republic of Korea | 76                 | MRSA             | Bone and joint, catheter-related, deep incisional/ organ space, endocarditis, pneumonia, skin and soft tissue, surgical site | 76.3    | NR           |
| Kullar et al. (2011)[15]     | Retrospective; the United States     | 320                | MRSA             | Bone and joint, catheter-related, deep abscess, endocarditis, multiple sites, pneumonia, skin/ wound                         | NR      | 54(NR)       |
| Moise et al. (2000)[16]      | Retrospective; the United States     | 53                 | MRSA, MSSA       | Lower respiratory tract                                                                                                      | 61      | 69.1(15)     |
| Zelenitsky et al. (2013)[17] | Retrospective; Canada                | 35                 | MRSA             | Bloodstream, central nervous system, endocarditis, intra-abdominal, lower respiratory tract, skin/skin structure             | 62.9    | 61.9 (15.2)  |

CoNS, coagulase-negative *Staphylococci*; MSSA, methicillin sensitive *Staphylococcus aureus*; NR, not reported; SD, standard difference.

<sup>a</sup> Additional clinical data required for analysis were collected retrospectively using a detailed chart review.

doi:10.1371/journal.pone.0146224.t001

**Table 2. Quality Appraisal of Observational Studies.**

| References(year)        | Quality indicators |                |                |                |                 |                 |                |                |                |
|-------------------------|--------------------|----------------|----------------|----------------|-----------------|-----------------|----------------|----------------|----------------|
|                         | 1 <sup>a</sup>     | 2 <sup>b</sup> | 3 <sup>c</sup> | 4 <sup>d</sup> | 5A <sup>e</sup> | 5B <sup>f</sup> | 6 <sup>g</sup> | 7 <sup>h</sup> | 8 <sup>i</sup> |
| Ampe et al.(2013)       | Yes                | Yes            | Yes            | Yes            | Yes             | Yes             | Yes            | Yes            | Yes            |
| Brown et al.(2012)      | Yes                | Yes            | Yes            | Yes            | Yes             | Yes             | Yes            | Yes            | Yes            |
| Gawronski et al.(2013)  | Yes                | Yes            | Yes            | Yes            | /               | /               | Yes            | Yes            | Yes            |
| Ghosh et al.(2014)      | Yes                | Yes            | Yes            | Yes            | Yes             | Yes             | Yes            | Yes            | Yes            |
| Holmes et al.(2013)     | Yes                | Yes            | Yes            | Yes            | No              | Yes             | Yes            | Yes            | Yes            |
| Jung et al.(2014)       | Yes                | Yes            | Yes            | Yes            | Yes             | Yes             | Yes            | Yes            | Yes            |
| Kullar et al.(2011)     | Yes                | Yes            | Yes            | Yes            | Yes             | Yes             | Yes            | Yes            | Yes            |
| Moise et al.(2000)      | Yes                | Yes            | Yes            | Yes            | Yes             | Yes             | Yes            | Yes            | Yes            |
| Zelenitsky et al.(2013) | Yes                | Yes            | Yes            | Yes            | No              | No              | Yes            | Yes            | Yes            |

<sup>a</sup> Indicates exposed cohort truly representative.

<sup>b</sup> Non-exposed cohort drawn from the same community.

<sup>c</sup> Ascertainment of exposure from a secure record.

<sup>d</sup> Outcome of interest not present at start of study.

<sup>e</sup> Cohorts comparable on basis of site and etiology of infections, or APACHEII Score.

<sup>f</sup> Cohorts comparable on other factors.

<sup>g</sup> Assessment of outcome of record linkage or independent blind assessment.

<sup>h</sup> Follow-ups that were sufficient for outcomes to occur.

<sup>i</sup> Complete accounting for cohorts.

doi:10.1371/journal.pone.0146224.t002

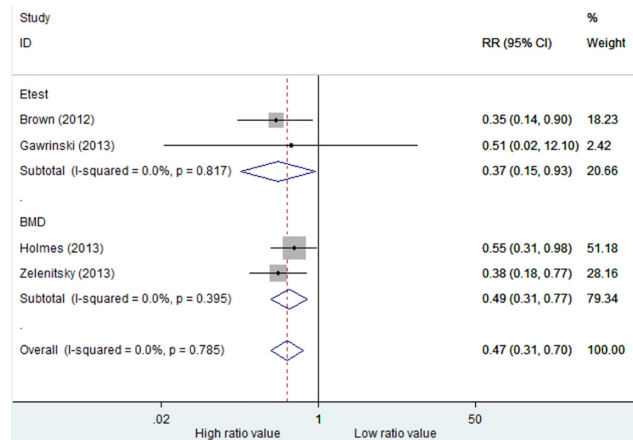

**Fig 2. Risk ratios of all-cause mortality rates: high versus low  $AUC_{0-24}/MIC$  ratio.** Test of all-cause mortality rates for overall effect:  $Z = 3.72$ ,  $P < 0.001$ ; test of all-cause mortality rates in Etest Study subgroup for overall effect:  $Z = 2.12$ ,  $P = 0.034$ ; test of all-cause mortality rates in BMD Study subgroup for overall effect:  $Z = 3.12$ ,  $P = 0.002$ .

doi:10.1371/journal.pone.0146224.g002

### Discussion

Our systematic review and meta-analysis demonstrated that high values of  $AUC_{0-24}/MIC$  had significant advantages compared to low values in terms of all-cause mortality rates (reduced by 53%) and rates of infection treatment failure (reduced by 53%, coming to 61% after correcting for heterogeneity) by reaching the breakpoint of 400. To the best of our knowledge, this report describes the first systematic review to support this hypothesis. Our research has raised the grade of evidence concerning this issue, which may be beneficial for clinicians, clinical pharmacists and future therapeutic drug monitoring guideline writers.

Kullar’s study was excluded from meta-analysis because of its significant effect on heterogeneity. The possible reason of the effect was that patients among the cohort had relatively higher baseline APACHE-II scores.

Importantly, the apparent values of  $AUC_{0-24}/MIC$  ratio vary depending on different MIC determination methods. Commonly applied methods include the BMD and Etest methods.

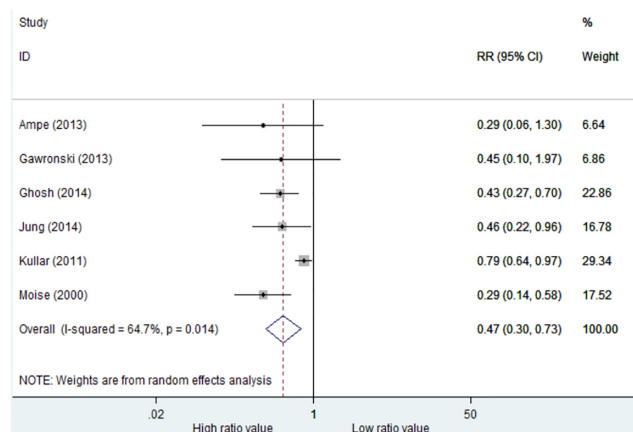

**Fig 3. Risk ratios of rates of infection treatment failure: high versus low  $AUC_{0-24}/MIC$  ratio.** Test of rates of infection treatment failure for overall effect:  $Z = 3.34$ ,  $P = 0.001$ .

doi:10.1371/journal.pone.0146224.g003

**Table 3. Outcomes, breakpoints of AUC<sub>0-24</sub>/MIC ratio and MIC determination methods of studies included in the meta-analysis.**

| Reference (year)         | Outcomes available in systematic review          | All-cause mortality (deaths/total) |                       | Infection treatment failure (failures/total) |                       | Breakpoints of AUC <sub>0-24</sub> /MIC ratio | MIC determination methods |
|--------------------------|--------------------------------------------------|------------------------------------|-----------------------|----------------------------------------------|-----------------------|-----------------------------------------------|---------------------------|
|                          |                                                  | Higher than breakpoint             | Lower than breakpoint | Higher than breakpoint                       | Lower than breakpoint |                                               |                           |
| Ampe et al. (2013)       | Infection treatment failure                      | /                                  | /                     | 2/14                                         | 3/6                   | 451                                           | BMD                       |
| Brown et al. (2012)      | All-cause mortality                              | 6/37                               | 6/7                   | /                                            | /                     | 211                                           | Etest                     |
| Gawronski et al. (2013)  | All-cause mortality; Infection treatment failure | 0/23                               | 1/36                  | 2/23                                         | 7/36                  | 293                                           | Etest                     |
| Ghosh et al. (2014)      | Infection treatment failure                      | /                                  | /                     | 18/77                                        | 27/50                 | 398                                           | BMD                       |
| Holmes et al. (2013)     | All-cause mortality                              | 17/108                             | 21/74                 | /                                            | /                     | 373                                           | BMD                       |
| Jung et al. (2014)       | Infection treatment failure                      | /                                  | /                     | 10/52                                        | 10/24                 | 398.5                                         | BMD                       |
| Kullar et al. (2011)     | Infection treatment failure                      | /                                  | /                     | 107/221                                      | 61/99                 | 421                                           | BMD                       |
| Moise et al. (2000)      | Infection treatment failure                      | /                                  | /                     | 7/32                                         | 16/21                 | 345                                           | BMD                       |
| Zelenitsky et al. (2013) | All-cause mortality                              | 6/20                               | 12/15                 | /                                            | /                     | 451                                           | BMD                       |

doi:10.1371/journal.pone.0146224.t003

Latter results are consistently 0.5 to 1.5 times higher than the former results after log2 conversion [18,19]. A target value of 400 recommended by the American guideline was based on results obtained from BMD method [6]. Among the studies included in this meta-analysis, 7 studies applied BMD method. Breakpoints of the AUC<sub>0-24</sub>/MIC ratio were entirely within the range of 85–115% of 400. In addition, because the breakpoints were calculated using a fine classification and regression tree (CART) algorithm and a margin of error may exist, there will be slight differences. Different infection sites and pathogens may also cause the variations, although apparent associations were difficult to be found based on included studies. Our study had confirmed the target AUC<sub>0-24</sub>/MIC value of 400.

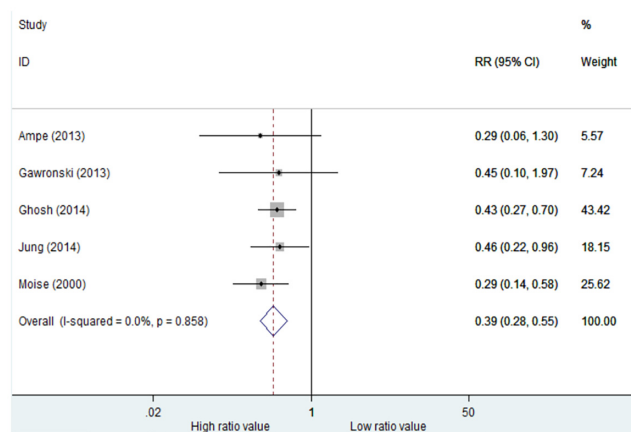

**Fig 4. Risk ratios of rates of infection treatment failure: high versus low AUC<sub>0-24</sub>/MIC ratio (Kullar's study was excluded).** Test of rates of infection treatment failure for overall effect: Z = 5.55, P < 0.001.

doi:10.1371/journal.pone.0146224.g004



Two studies reported 211 and 293 as breakpoints respectively. The Etest method was applied for MIC determination, which probably accounting for the lower values. Holmes *et al.* [13] had performed a linear regression analysis and found that the target of 400 (based on BMD method) was equivalent to 226 based on the Etest method, which was very close to 211. This provided evidence for our analysis.

Pharmacokinetic and pharmacodynamics reviews have recommended the  $AUC_{0-24}/MIC$  ratio as the preferred parameter partly based on data obtained from animal models, *in vitro* studies and limited human studies [20–23]. Moise-Broder *et al.* explored the use of  $AUC_{0-24}/MIC$  ratio in predicting clinical and microbiological success in the treatment of ventilator-associated *S. aureus* pneumonia. An  $AUC_{0-24}/MIC$  ratio of  $\geq 400$  was advocated as a target to achieve clinical success with vancomycin [6]. On the basis of these studies, the vancomycin TDM guideline (published in 2009) developed by American Society of Hospital-System Pharmacists recommended 400 as a clinically target, which requiring further support from solid evidence-based research.

However, there are some deficiencies in this study. First, a relatively small number of studies were included, which were all observational ones. Second, there was significant heterogeneity among the six studies, which reported the rate of infection treatment failure. After we found and excluded the questionable study, the problem was resolved and meta-analysis results were consistent.

This study focused on the relevant predictors of vancomycin clinical effectiveness. At the present, researches on the association between vancomycin  $AUC_{0-24}/MIC$  and safety are limited. Some studies showed that high ratio values may increase the incidence of nephrotoxicity [18]. Neely *et al.* [24] discovered that when the  $AUC_{0-24}/MIC$  ratio was higher than 700, the incidence of nephrotoxicity was significantly increased, based on a population model. Lodise *et al.* [25] found that in 27 patients whose  $AUC_{0-24}/MIC$  values were equal to or higher than 1300, 26% had developed nephrotoxicity. Additional studies on nephrotoxicity are needed in the future.

In conclusion, this report describes the first systematic review indicating that achieving a high  $AUC_{0-24}/MIC$  ratio of vancomycin could significantly decrease mortality rates by 53% and rates of infection treatment failure by 61%, with 400 being a reasonable target.

## Supporting Information

**S1 Fig. Sensitivity analysis of the studies reporting the rate of infection treatment failure.**  
(TIF)

**S1 File. A protocol of Chinese practice guideline for therapeutic drug monitoring of vancomycin (Including details of the first step of literatures selection).**  
(PDF)

**S2 File. PRISMA 2009 Checklist.**  
(DOC)

**S3 File. List of full-text excluded articles and reasons for exclusion.**  
(DOCX)

## Acknowledgments

We thank all of the members of our study team for their whole-hearted cooperation and the original authors of the included studies for their wonderful excellent work.

## Author Contributions

Conceived and designed the experiments: SDZ RSZ. Performed the experiments: PM HBL. Analyzed the data: PM HBL. Wrote the paper: PM HBL.

## References

1. Vandecasteele SJ, De Vriese AS, Tacconelli E. The pharmacokinetics and pharmacodynamics of vancomycin in clinical practice: Evidence and uncertainties. *J Antimicrob Chemother.* 2013; 68(4): 743–748. doi: [10.1093/jac/dks495](https://doi.org/10.1093/jac/dks495) PMID: [23249839](https://pubmed.ncbi.nlm.nih.gov/23249839/)
2. Holland TL, Fowler VG Jr. Vancomycin minimum inhibitory concentration and outcome in patients with *Staphylococcus aureus* bacteremia: pearl or pellet? *J Infect Dis.* 2011; 204(3): 329–331. doi: [10.1093/infdis/jir275](https://doi.org/10.1093/infdis/jir275) PMID: [21742827](https://pubmed.ncbi.nlm.nih.gov/21742827/)
3. Ye ZK, Tang HL, Zhai SD. Benefits of therapeutic drug monitoring of vancomycin: a systematic review and meta-analysis. *PLoS One.* 2013; 8(10): e77169. doi: [10.1371/journal.pone.0077169](https://doi.org/10.1371/journal.pone.0077169) PMID: [24204764](https://pubmed.ncbi.nlm.nih.gov/24204764/)
4. Rybak MJ. The pharmacokinetic and pharmacodynamic properties of vancomycin. *Clin Infect Dis.* 2006; 42 Suppl 1: S35–S39. PMID: [16323118](https://pubmed.ncbi.nlm.nih.gov/16323118/)
5. Rybak M, Lomaestro B, Rotschafer JC, Moellering R Jr., Craig W, Billeter M, et al. Therapeutic monitoring of vancomycin in adult patients: a consensus review of the American Society of Health-System Pharmacists, the Infectious Diseases Society of America, and the Society of Infectious Diseases Pharmacists. *Am J Health Syst Pharm.* 2009; 66(1): 82–98. doi: [10.2146/ajhp080434](https://doi.org/10.2146/ajhp080434) PMID: [19106348](https://pubmed.ncbi.nlm.nih.gov/19106348/)
6. Moise-Broder PA, Forrest A, Birmingham MC, Schentag JJ. Pharmacodynamics of vancomycin and other antimicrobials in patients with *Staphylococcus aureus* lower respiratory tract infections. *Clin Pharmacokinet.* 2004; 43(13): 925–942. PMID: [15509186](https://pubmed.ncbi.nlm.nih.gov/15509186/)
7. Higgins JP, Thompson SG. Quantifying heterogeneity in a meta-analysis. *Stat Med.* 2002; 21(11): 1539–1558. PMID: [12111919](https://pubmed.ncbi.nlm.nih.gov/12111919/)
8. Egger M, Davey Smith G, Schneider M, Minder C. Bias in meta-analysis detected by a simple, graphical test. *BMJ.* 1997; 315(7129): 629–634.
9. Ampe E, Delaere B, Hecq JD, Tulkens PM, Glupczynski Y. Implementation of a protocol for administration of vancomycin by continuous infusion: Pharmacokinetic, pharmacodynamic and toxicological aspects. *Int J Antimicrob Agents.* 2013; 41(5): 439–446. doi: [10.1016/j.ijantimicag.2013.01.009](https://doi.org/10.1016/j.ijantimicag.2013.01.009) PMID: [23523733](https://pubmed.ncbi.nlm.nih.gov/23523733/)
10. Brown J, Brown K, Forrest A. Vancomycin AUC24/MIC ratio in patients with complicated bacteremia and infective endocarditis due to methicillin-resistant *Staphylococcus aureus* and its association with attributable mortality during hospitalization. *Antimicrob Agents Chemother.* 2012; 56(2): 634–638. doi: [10.1128/AAC.05609-11](https://doi.org/10.1128/AAC.05609-11) PMID: [22123681](https://pubmed.ncbi.nlm.nih.gov/22123681/)
11. Gawronski KM, Goff DA, Brown J, Khadem TM, Bauer KA. A stewardship program's retrospective evaluation of vancomycin AUC24/MIC and time to microbiological clearance in patients with methicillin-resistant *Staphylococcus aureus* bacteremia and osteomyelitis. *Clin Ther.* 2013; 35(6): 772–779. doi: [10.1016/j.clinthera.2013.05.008](https://doi.org/10.1016/j.clinthera.2013.05.008) PMID: [23795575](https://pubmed.ncbi.nlm.nih.gov/23795575/)
12. Ghosh N, Chavada R, Maley M, van Hal SJ. Impact of source of infection and vancomycin AUC0-24/MICBMD targets on treatment failure in patients with methicillin-resistant *Staphylococcus aureus* bacteraemia. *Clin Microbiol Infect.* 2014; 20(12): O1098–1105. doi: [10.1111/1469-0691.12695](https://doi.org/10.1111/1469-0691.12695) PMID: [24890030](https://pubmed.ncbi.nlm.nih.gov/24890030/)
13. Holmes NE, Turnidge JD, Munckhof WJ, Robinson JO, Korman TM, O'Sullivan MV, et al. Vancomycin AUC/MIC ratio and 30-day mortality in patients with *Staphylococcus aureus* bacteremia. *Antimicrob Agents Chemother.* 2013; 57(4): 1654–1663. doi: [10.1128/AAC.01485-12](https://doi.org/10.1128/AAC.01485-12) PMID: [23335735](https://pubmed.ncbi.nlm.nih.gov/23335735/)
14. Jung Y, Song KH, Cho J, Kim HS, Kim NH, Kim TS, et al. Area under the concentration-time curve to minimum inhibitory concentration ratio as a predictor of vancomycin treatment outcome in methicillin-resistant *Staphylococcus aureus* bacteraemia. *Int J Antimicrob Agents.* 2014; 43(2): 179–183. doi: [10.1016/j.ijantimicag.2013.10.017](https://doi.org/10.1016/j.ijantimicag.2013.10.017) PMID: [24315788](https://pubmed.ncbi.nlm.nih.gov/24315788/)
15. Kullar R, Davis SL, Levine DP, Rybak MJ. Impact of vancomycin exposure on outcomes in patients with methicillin-resistant *Staphylococcus aureus* bacteremia: support for consensus guidelines suggested targets. *Clin Infect Dis.* 2011; 52(8): 975–981. doi: [10.1093/cid/cir124](https://doi.org/10.1093/cid/cir124) PMID: [21460309](https://pubmed.ncbi.nlm.nih.gov/21460309/)
16. Moise PA, Forrest A, Bhavnani SM, Birmingham MC, Schentag JJ. Area under the inhibitory curve and a pneumonia scoring system for predicting outcomes of vancomycin therapy for respiratory infections by *Staphylococcus aureus*. *Am J Health Syst Pharm.* 2000; 57 Suppl 2: S4–S9. PMID: [11057360](https://pubmed.ncbi.nlm.nih.gov/11057360/)
17. Zelenitsky S, Rubinstein E, Ariano R, Iacovides H, Dodek P, Mirzanejad Y, et al. Vancomycin pharmacodynamics and survival in patients with methicillin-resistant *Staphylococcus aureus*-associated septic

- shock. *Int J Antimicrob Agents*. 2013; 41(3): 255–260. doi: [10.1016/j.ijantimicag.2012.10.015](https://doi.org/10.1016/j.ijantimicag.2012.10.015) PMID: [23312606](https://pubmed.ncbi.nlm.nih.gov/23312606/)
18. Giuliano C, Haase KK, Hall R. Use of vancomycin pharmacokinetic-pharmacodynamic properties in the treatment of MRSA infections. *Expert Rev Anti Infect Ther*. 2010; 8(1): 95–106. doi: [10.1586/eri.09.123](https://doi.org/10.1586/eri.09.123) PMID: [20014904](https://pubmed.ncbi.nlm.nih.gov/20014904/)
  19. Sader HS, Rhomberg PR, Jones RN. Nine-hospital study comparing broth microdilution and Etest method results for vancomycin and daptomycin against methicillin-resistant *Staphylococcus aureus*. *Antimicrob Agents Chemother*. 2009; 53(7): 3162–3165. doi: [10.1128/AAC.00093-09](https://doi.org/10.1128/AAC.00093-09) PMID: [19398641](https://pubmed.ncbi.nlm.nih.gov/19398641/)
  20. Craig WA. Basic pharmacodynamics of antibacterials with clinical applications to the use of beta-lactams, glycopeptides, and linezolid. *Infect Dis Clin North Am*. 2003; 17(3): 479–501. PMID: [14711073](https://pubmed.ncbi.nlm.nih.gov/14711073/)
  21. Craig WA. Pharmacokinetic/pharmacodynamic parameters: rationale for antibacterial dosing of mice and men. *Clin Infect Dis*. 1998; 26(1): 1–12. PMID: [9455502](https://pubmed.ncbi.nlm.nih.gov/9455502/)
  22. Lowdin E, Odenholt I, Cars O. In vitro studies of pharmacodynamic properties of vancomycin against *Staphylococcus aureus* and *Staphylococcus epidermidis*. *Antimicrob Agents Chemother*. 1998; 42(10): 2739–2744. PMID: [9756787](https://pubmed.ncbi.nlm.nih.gov/9756787/)
  23. Ackerman BH, Vannier AM, Eudy EB. Analysis of Vancomycin time-kill studies with *Staphylococcus* species by using a curve stripping program to describe the relationship between concentration and pharmacodynamic response. *Antimicrob Agents Chemother*. 1992; 36(8): 1766–1769. PMID: [1416862](https://pubmed.ncbi.nlm.nih.gov/1416862/)
  24. Neely MN, Youn G, Jones B, Jelliffe RW, Drusano GL, Rodvold KA, et al. Are vancomycin trough concentrations adequate for optimal dosing? *Antimicrob Agents Chemother*. 2014; 58(1): 309–316. doi: [10.1128/AAC.01653-13](https://doi.org/10.1128/AAC.01653-13) PMID: [24165176](https://pubmed.ncbi.nlm.nih.gov/24165176/)
  25. Lodise TP, Patel N, Lomaestro BM, Rodvold KA, Drusano GL. Relationship between initial vancomycin concentration-time profile and nephrotoxicity among hospitalized patients. *Clinical Infectious Diseases*. 2009; 49(4): 507–514. doi: [10.1086/600884](https://doi.org/10.1086/600884) PMID: [19586413](https://pubmed.ncbi.nlm.nih.gov/19586413/)
